# Supplementary material
Source: PubMed Central journal article supplement (PMC7193547)
Supplement: es8b01004_si_001.pdf [file es8b01004_si_001.pdf]

1  
2  
3  
4  
5  
6  
7  
8  
9  
10  
11  
12  
13  
14  
15  
16  
17  
18  
19  
20  
21  
22  
23  
24  
25  
26  
27  
28  
29  
30

## Supporting Information for

### High permeation rates in liposome systems explain rapid glyphosate biodegradation

#### associated with strong isotope fractionation

Benno N. Ehrl,<sup>†</sup> Emmanuel O. Mogusu,<sup>†,¶</sup> Kyoungtea Kim,<sup>‡</sup> Heike Hofstetter,<sup>§</sup> Joel A. Pedersen,<sup>\*,‡,§</sup>

Martin Elsner<sup>\*,†,⊠</sup>

<sup>†</sup> Institute of Groundwater Ecology, Helmholtz Zentrum München, Ingolstädter Landstrasse 1, 85764 Neuherberg, Germany

<sup>¶</sup> Department of Chemistry, Mwenge Catholic University, P.O.BOX 1226, Moshi, Tanzania

<sup>‡</sup> Molecular and Environmental Toxicology Center, University of Wisconsin, Madison, WI 53706, USA

<sup>§</sup> Department of Chemistry, University of Wisconsin, Madison, WI 53706, USA

<sup>‡</sup> Departments of Soil Science and Civil & Environmental Chemistry, University of Wisconsin, Madison, WI 53706, USA

<sup>⊠</sup> Institute of Hydrochemistry, Chair for Analytical Chemistry and Water Chemistry, Technical University of Munich, Marchioninistrasse 17, 81377 Munich, Germany

#### SUMMARY

5 pages, 3 figures and one table

#### CONTENT

##### Experimental Section

Chemicals

Media composition

Isolation of *Ochrobactrum sp.* FrEM

##### Supporting Figures

SI Figure S1: <sup>1</sup>H with solvent suppression and <sup>31</sup>P{<sup>1</sup>H} spectra of glyphosate

SI Figure S2: Micrograph of *Ochrobactrum sp.* FrEM

SI Figure S3: Phylogenetic position of the strain FrEM within *Ochrobactrum* species.

SI Figure S4: LC-IRMS chromatogram

##### Supporting Table

SI Table S1: Summary of NMR spectra collection parameters.

##### Supporting References

31 **Supporting experimental section**

32 **Chemicals and media composition**

33 The following chemicals were used in the liposome permeation study: glyphosate (98%, Sigma  
34 Aldrich), D<sub>2</sub>O (99.9%, Sigma Aldrich), sodium hydroxide (97%, Fisher scientific), 1-palmitoyl-2-oleoyl-  
35 *sn*-glycero-3-phosphocholine (99%, Avanti Polar Lipids), praseodymium(III)-chloride (99.99%, Fisher  
36 scientific), and 3-(trimethylsilyl)-2,2,3,3-tetradeuteropropionic acid (98 atom % D, Sigma Aldrich).

37 The following chemicals were used for the isolation of *Ochrobactrum sp.* FrEM and for glyphosate  
38 degradation: glyphosate (99%, Sigma Aldrich), ammonium acetate (99%, Sigma Aldrich), sodium  
39 glutamate (99%, Sigma-Aldrich), sodium peroxodisulfate (99%, Fluka), potassium hydroxide (99%,  
40 Fluka), phosphoric acid (99%, Fluka), , potassium dihydrogenphosphate (99%, AppliChem), sodium  
41 hydrogenphosphate (98%, Sigma Aldrich), sodium hydroxide (99%, Sigma Aldrich), potassium sulfate  
42 (99%, Merck), ammonium chloride (99.5%, Sigma Aldrich), magnesium sulfate heptahydrate (99%,  
43 Fluka), calcium chloride hexahydrate (94%, Roth), boric acid (99.8%, Merck), manganese sulfate  
44 monohydrate (99%, Sigma Aldrich), zinc sulfate heptahydrate (99%, Fisher Scientific), nickel chloride  
45 hexahydrate (99%, Merck) sodium molybdate dihydrate (99.5%, Merck), and iron sulfate  
46 heptahydrate (98%, Sigma Aldrich).

47 The medium contained (in gL<sup>-1</sup>): NH<sub>4</sub>Cl, 2.0; MgSO<sub>4</sub> × 7 H<sub>2</sub>O, 0.2; K<sub>2</sub>SO<sub>4</sub>, 0.5; as well as trace elements  
48 (in mgL<sup>-1</sup>): FeSO<sub>4</sub> × 7H<sub>2</sub>O, 2.5; CaCl<sub>2</sub> × 6H<sub>2</sub>O, 10.0; CuSO<sub>4</sub> × 5H<sub>2</sub>O, 2.0; H<sub>3</sub>BO<sub>3</sub>, 0.06; ZnSO<sub>4</sub> × 7 H<sub>2</sub>O, 20.0;  
49 MnSO<sub>4</sub> × H<sub>2</sub>O, 1.0; NiCl<sub>2</sub> × 6H<sub>2</sub>O, 0.05; Na<sub>2</sub>MoO<sub>4</sub> × 2H<sub>2</sub>O, 0.3.

50 **Bacterial isolation and characterization**

51 The soil samples were collected from different plots (and later combined) on a vineyard site in  
52 northern France (Agricultural and Viticultural College of Rouffach - Rouffach soil) where glyphosate  
53 was the most frequently used herbicide with a yearly application of between 18 and 61 kg·ha<sup>-1</sup>.<sup>1</sup> Soil  
54 samples from each plot location were thoroughly mixed in sterile bottles, sealed, transported to the  
55 laboratory and stored at 4 °C until use.

56 For bacterial isolation from soil, medium (see above) containing 60 mM sodium glutamate as carbon  
57 source was used. Ammonium chloride was used as nitrogen source, and glyphosate was the sole  
58 phosphorous source. Soil samples (10 g) were first sieved (> 2 mm). Then, 5 g of soil were suspended  
59 in 10 mL sterile water and centrifuged. A 1 mL aliquot of the supernatant was used to inoculate 50  
60 mL medium containing 3 mM glyphosate and incubated at 30 °C at 160 rpm for 24 h. Several  
61 transfers were made and later streaked on agar plates containing 3 mM glyphosate. The single  
62 colonies formed were inoculated on agar plate to represent the pure isolated strain. The isolated  
63 bacteria were identified using 16S rRNA gene sequencing. For 16S rRNA gene amplification, the  
64 chromosomal DNA was isolated using a bacterial DNA extraction kit (Roche Applied Science,  
65 Germany) following the protocol of the manufacturer. PCR amplification was performed using  
66 universal primers (forward 27f and reverse 1492r). Standard PCR conditions was carried out in a 50  
67 µL volume containing 1× PCR buffer, 1.5 mM MgCl<sub>2</sub>, 2 mM dNTP mixture, 1 µM primers, 1 µM of Pfu  
68 DNA polymerase (Fermentas, St. Leon-Rot, Germany), and 2 ng of template DNA. DNA was purified  
69 from a gel using an Agarose Gel Extraction kit (Roche Applied Sciences, Germany) and sequenced.  
70 Sequence homologies were evaluated using BLAST software (version 2.2.12). ClustalQ software was  
71 used to align the sequences. A neighbour-joining tress was constructed using Molecular Evolution  
72 Genetic Analysis (MEGA) software (version 6.0).

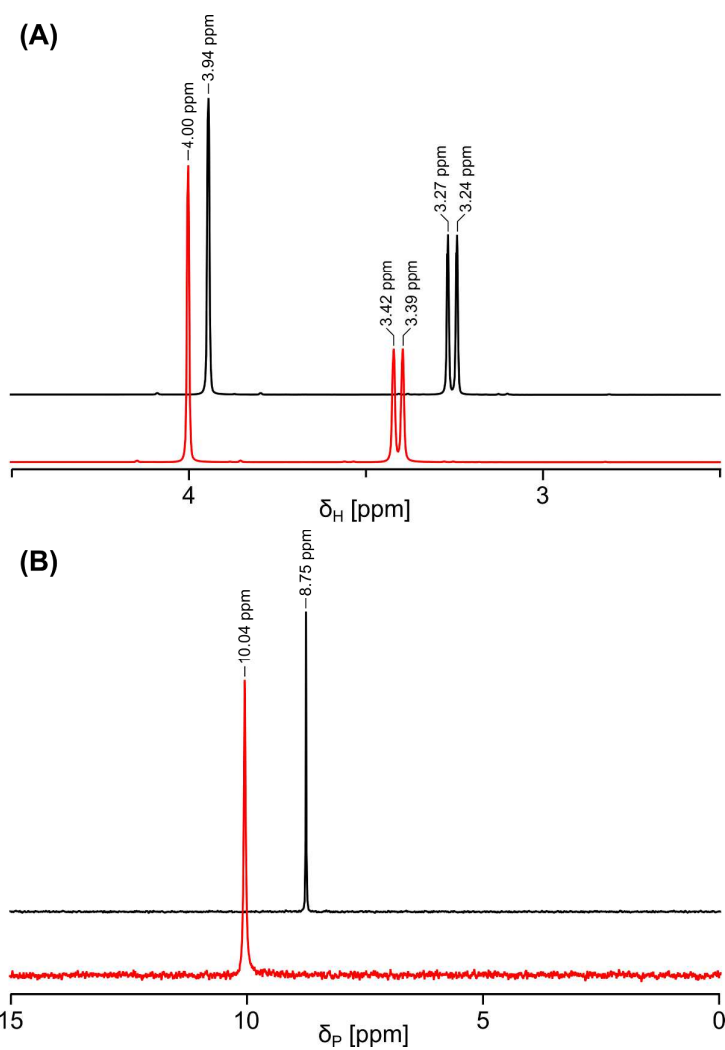

74

75 **SI Figure S1.** (A)  $^1\text{H}$  with solvent suppression and (B)  $^{31}\text{P}\{^1\text{H}\}$  spectra of glyphosate without (black) and  
76 with addition of 1 mM  $\text{PrCl}_3$  (red). The NMR spectra were obtained glyphosate in  $\text{D}_2\text{O}$  without pH  
77 adjustment where glyphosate dissociates into the monoanionic and the zwitterionic form.<sup>2</sup> The  
78 chemical shifts of glyphosate depend on pH. Therefore, the chemical shifts in these spectra differ  
79 from those presented in **Figure 1** and **Figure 2**.

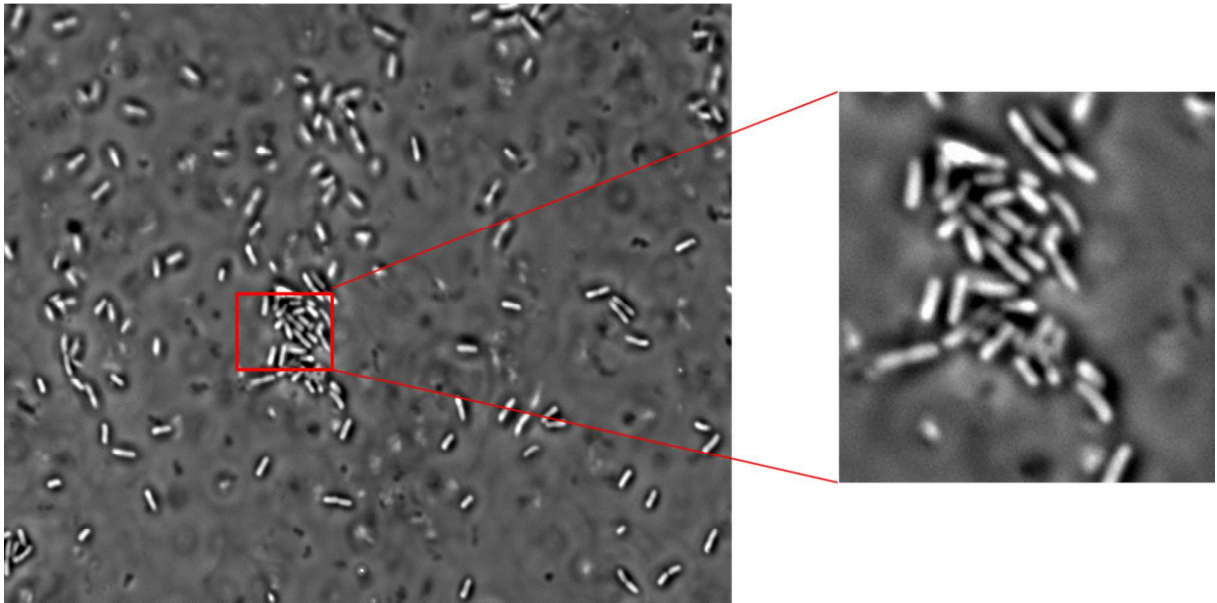

80

81 **SI Figure S2.** Micrograph of *Ochrobactrum* sp FrEM cells by light microscope (Axioskop Plus2, ZEISS,  
 82 Germany (×100 resolution oil emulsion), AxioVision 4.1

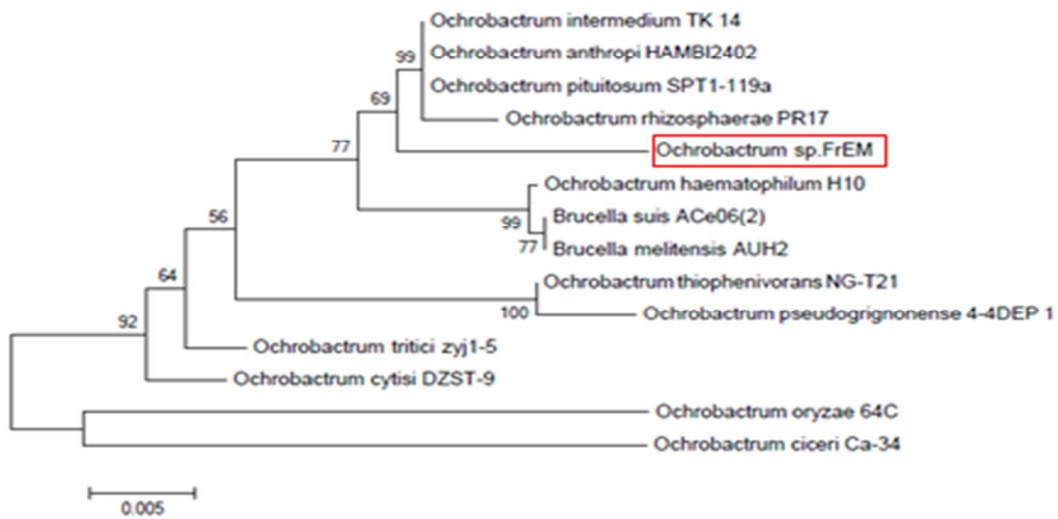

83

84 **SI Figure S3.** Phylogenetic position of the strain FrEM within *Ochrobactrum* species. Neighbour-  
 85 joining tree based on partial 16S rRNA sequence. The bar indicates 0.005 substitutions per  
 86 nucleotide.

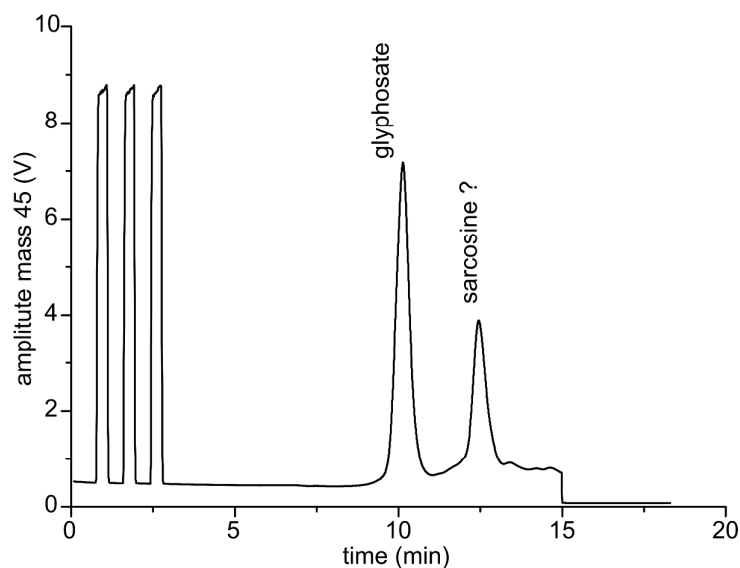

87

88 **SI Figure S4.** LC-IRMS chromatogram of ongoing glyphosate biodegradation. The three peaks  
 89 between 0 s and 200 s are the CO<sub>2</sub> peaks of the reference gas. Glyphosate elutes around 10 min and  
 90 is separated (resolution 2.3) from the peak around 12.5 min which could be the metabolite sarcosine.  
 91 The CO<sub>2</sub> background increases after 11 minutes, probably due to overloading the column with the  
 92 carbon source glutamate which elutes after 900 s when the split to the IRMS is already closed.

**SI Table S1. Summary of NMR spectra collection parameters**

| experiment                                                                                 | transmitter | relaxation | spectral | acquisition | number   |
|--------------------------------------------------------------------------------------------|-------------|------------|----------|-------------|----------|
|                                                                                            | frequency   | delay      | width    | time        | of scans |
|                                                                                            | offset      | (s)        | (Hz)     | (s)         |          |
| <sup>1</sup> H Standard                                                                    | 3165.1 Hz   | 1.0        | 9973.4   | 2.855       | 8        |
| <sup>31</sup> P{ <sup>1</sup> H} Standard                                                  | 10028.7 Hz  | 2.0        | 81521.7  | 0.99        | 16       |
| <sup>1</sup> H with solvent suppression (watergate W5)                                     | HOD freq.   | 1.5        | 7978.7   | 2.4009      | 128      |
| <sup>1</sup> H{ <sup>31</sup> P} with solvent suppression prior PrCl <sub>3</sub> addition | HOD freq.   | 1.5        | 10000.0  | 1.499       | 16       |
| <sup>1</sup> H{ <sup>31</sup> P} with solvent suppression after PrCl <sub>3</sub> addition | HOD freq.   | 1.5        | 10000.0  | 1.499       | 64       |

93 **Supporting Information References**

94 1. Gregoire, C.; Payraudeau, S.; Domange, N., Use and fate of 17 pesticides applied on a  
 95 vineyard catchment. *International Journal of Environmental and Analytical Chemistry* **2010**, *90*, (3-6),  
 96 406-420.

97 2. Sprankle, P.; Meggitt, W.; Penner, D., Adsorption, mobility, and microbial degradation of  
98 glyphosate in the soil. *Weed Science* **1975**, 229-234.
